1 **REGIONALLY DIFFUSE MUSCLE PAIN-HYPERSENSITIVITY IN HUMANS**  
2 **DURING ACUTE MUSCLE PAIN**

3 RUNNING HEAD: REGIONALLY DIFFUSE PAIN-HYPERSENSITIVITY

4 *J. S. Dunn<sup>1</sup>, S. S. Nagi<sup>1,2</sup> & D. A. Mahns<sup>1</sup>*

5 <sup>1</sup>*School of Medicine, Western Sydney University, Locked Bag 1797, Penrith, NSW 2751, Australia*

6 <sup>2</sup>*Department of Clinical and Experimental Medicine, Center for Social and Affective Neuroscience,*  
7 *Linköping University, 58183, Sweden*

8 Corresponding Author: *James S. Dunn,*

9 *Email: [James.dunn@westernsydney.edu.au](mailto:James.dunn@westernsydney.edu.au)*

10 *Postal Address: School of Medicine, Western Sydney University, Locked Bag*  
11 *1797, Penrith, NSW 2751, Australia*

12 *Phone: +61 (02) 4620 3707*

13 For submission of an **Original Article**

14 Funding Sources: This work was supported by the Western Sydney University  
15 School of Medicine. The funding body had *no* role in the design of the study and  
16 collection, analysis, and interpretation of data and in manuscript preparation.

17 Disclosures: The authors declare no conflicts of interest.

18 Significance: This work provides evidence for a regionally diffuse type of pain  
19 hypersensitivity, manifesting as a painful response to normally sub-perceptual  
20 stimulation in the context of acute experimentally induced muscle pain. This  
21 phenomenon may provide parallels to clinically relevant painful conditions and  
22 neuropathies.

23 **Abstract**

24 Background: We have previously shown that an intramuscular infusion of 5%  
25 hypertonic saline (HS) produces a painful response to normally innocuous stimuli  
26 applied to overlying and adjacent *skin* regions. In the current study, we explored  
27 whether a similar interaction could be observed between adjacent, contralateral and  
28 remote muscles. Indeed, widespread muscle pain-hypersensitivity is a hallmark of  
29 chronic pain conditions such as fibromyalgia.

30 Methods: 5% HS was infused into the *flexor carpi ulnaris* (FCU) muscle to develop a  
31 stable baseline pain (n=30). In separate experiments, each of the three test locations  
32 (n=10 per site), the adjacent *abductor digiti minimi* (ADM), contralateral FCU and  
33 contralateral *tibialis anterior* (TA) (**part 1-3**, respectively), 50µL of 0.9% normal saline  
34 (NS) was infused (in triplicate) prior to, during and following HS-induced muscle pain.

35 Results: Under control conditions (no background pain), the infusion of NS was  
36 *imperceptible* by all subjects. In the presence of HS-induced background pain (FCU),  
37 in **part 1** the NS co-infusion into ADM increased overall pain by 17%. This was  
38 replicated in the contralateral FCU (**part 2**) with a 12% pain increase, and in the TA  
39 (**part 3**) with a 15% pain increase in response to the NS co-infusions. Notably, over  
40 80% of subjects perceived the NS-induced increase in pain at the HS-infusion  
41 location (FCU) rather than the NS-infusion location (adjacent, contralateral and  
42 remote).

43 Conclusions: Intramuscular infusion of HS results in pain-hypersensitivity to sub-  
44 perceptual stimulation of muscle afferents in a somatotopically unrestricted manner,  
45 indicating the involvement of a central (likely supra-spinal) mechanism.

46

## 47 **Introduction**

48 For most individuals it is relatively easy to distinguish between innocuous and  
49 noxious stimuli. However, in a subset of individuals afflicted by chronic pain there is  
50 a disturbance of normal somatosensory function, such that a normally innocuous  
51 stimulus can evoke pain (Berglund et al., 2002; Clauw, 2014; Wolfe et al., 1995).  
52 Such pain manifestations have debilitating impacts on both the individual (Clauw,  
53 2014; Koroschetz et al., 2011) and society (Doth et al., 2010; van Leeuwen et al.,  
54 2012).

55 It has been observed that inputs from large-diameter (A $\beta$ /Group I-II) mechano-  
56 sensitive afferents in the skin and muscle can contribute to pain hypersensitivity in  
57 acute and chronic pain states (Price et al., 1992; Torebjörk et al., 1992; Weerakkody  
58 et al., 2003; Weerakkody et al., 2001). It is postulated that this phenomenon involves  
59 the convergence of inputs from superficially terminating nociceptive small-diameter  
60 fibres and the deeper terminating mechanoreceptive large-diameter fibres in the  
61 dorsal horn (Basbaum et al., 2009; Brown, 1982; Purves et al., 2001). In addition to  
62 the role of large-diameter mechano-afferents in pain hypersensitivity, an increasing  
63 body of evidence has implicated their unmyelinated counterparts, C-tactile fibres in  
64 the skin (Nagi et al., 2015; Nagi et al., 2011; Samour et al., 2015; Seal et al., 2009).  
65 Furthermore, such studies have revealed that hypertonic saline (HS)-evoked pain  
66 induces a state of touch-evoked pain (allodynia) that extends to overlying (Nagi et  
67 al., 2011; Samour et al., 2015) and adjacent (distal) skin regions (Nagi & Mahns,  
68 2013; Nagi et al., 2011; Samour et al., 2015). Likewise, intramuscular HS produces a  
69 deep musculoskeletal pain that often extends or refers to distal regions (Graven-  
70 Nielsen, 2006; Graven-Nielsen et al., 1997a, 1997b; Kellgren, 1938; Steinbrocker et  
71 al., 1953), produces a remapping of cortical pain areas (Rubin et al., 2010) and a

72 pain hypersensitivity that extends bilaterally (Samour et al., 2017). These complex  
73 interactions cannot readily be explained by changes in peripheral circuitry and  
74 appear to mimic characteristics of chronic pain conditions such as fibromyalgia.  
75 Within such chronic conditions, current arguments favour an explanation based on a  
76 central change in, or sensitization of, neural function that results in the observed  
77 widespread and diffuse musculoskeletal pain, pressure-pain hypersensitivity,  
78 cutaneous allodynia and tactile dysesthesia (Ablin et al., 2008; Berglund et al., 2002;  
79 Bradley, 2009; Case et al., 2016; Clauw, 2009).

80 In this study a HS infusion model was used in order to examine whether the  
81 interaction previously observed between muscle and skin (Nagi & Mahns, 2013; Nagi  
82 et al., 2011; Samour et al., 2015; Samour et al., 2017) could be replicated between  
83 adjacent and remote muscles. We hypothesized that the presence of background  
84 (sustained) nociceptive activity using HS infusion would result in a state of central  
85 sensitization, such that the application of a normally innocuous stimulus (normal  
86 saline, NS) subsequently would result in exacerbation of overall pain, regardless of  
87 whether the NS was infused into adjacent or remote muscles.

88

## 89 **Methods**

90 24 healthy subjects aged 18-28 years (6 females), with no reported history of  
91 musculoskeletal or neurological disorders, were recruited for this study. Subjects  
92 were also asked to abstain from intensive bouts of exercise for 48 hours preceding  
93 the experiment so as not to sensitize the target muscles (Weerakkody et al., 2001).  
94 Eight subjects participated in multiple arms of the study across different experimental  
95 sittings. Informed written consent was obtained from each participant prior to each

96 experiment. This study was approved by the Human Research Ethics Committee  
97 (approval number: H9190) of Western Sydney University in accordance with the  
98 revised Declaration of Helsinki.

99 Subjects sat comfortably in a chair throughout all experiments. Infusions of HS and  
100 NS were performed using a Harvard Apparatus Syringe Infusion Pump 22 (Harvard  
101 Apparatus, South Natick, Massachusetts, USA). Pain ratings were continuously  
102 recorded using an ADInstruments Response meter with input run through an  
103 ADInstruments Power Lab (ADInstruments, Dunedin, New Zealand).

104

#### 105 *Infusion of hypertonic saline*

106 Across all arms of the study, 5% HS was infused into the belly of the *flexor carpi*  
107 *ulnaris* (FCU) muscle for ~10 min to ensure for the baseline pain to stabilize. The  
108 infusion rate of HS in the FCU varied between subjects (30-175  $\mu\text{L}/\text{min}$ ) in order to  
109 establish a moderate pain intensity between 4 and 6 on a visual analog scale (VAS)  
110 ranging from 0 (no pain) to 10 (worst pain).

111

#### 112 *Infusion of normal saline*

113 After a stable baseline pain was maintained for at least a minute, HS-NS co-infusion  
114 events followed. NS (0.9%) was infused at the rate of 50  $\mu\text{L}/\text{min}$  for 1 min per trial  
115 (tested in triplicate). This duration was chosen based on the data collected in a pilot  
116 study which indicated a delay of ~30 s before the onset of an increase in pain levels.  
117 Subjects were asked to rate the overall pain intensity, and any changes thereof, on  
118 the VAS. Care was taken to avoid the use of suggestive language before the

119 subjects. The triplicate NS trials were performed at ~1-min intervals. During these  
120 intervals, subjects were asked to verbally localize the region of pain localisation.

121 In addition to concurrent HS-S infusions, NS alone was infused in triplicate trials prior  
122 to the commencement and upon cessation of HS-evoked pain in all experiments.

123 Typically, the HS-evoked pain disappeared over a time course of under 10 min. After  
124 a 3-5 min wait following cessation of pain, NS infusion was repeated at each site.

125 Collectively,  $\approx 450 \mu\text{L}$  of NS was infused per muscle.

126

### 127 *Part 1: Interactions with adjacent muscles*

128 NS was infused into the ipsilateral *abductor digiti minimi* (ADM) in order to examine  
129 potential interactions between *adjacent* muscles in response to HS induced acute  
130 muscular pain. The ADM muscle was chosen as it shares the same peripheral  
131 innervation (ulnar nerve) as the HS infused FCU.

132

### 133 *Part 2: Contralateral interactions*

134 NS was infused into the belly of contralateral FCU muscle in order to test whether  
135 the HS-NS interactions were limited to muscles within the same nerve territory or  
136 spread to contralateral muscles as well (i.e. central involvement).

137

### 138 *Part 3: Remote interactions*

139 NS was delivered to the belly of the *tibialis anterior* (TA) muscle in order to determine  
140 the spatial extent of inter-muscle interactions in an acute pain state.

141

142 *Statistical analysis*

143 Repeated measures two-way analysis of variance (RM 2-way ANOVA) was used to  
144 compare pain evoked at baseline (HS infusion alone) with test responses (co-  
145 infusion of NS and HS) at each location (adjacent, contralateral and remote). Where  
146 a significant change ( $p < 0.05$ ) was found, individual comparisons were made using  
147 a Tukey's multiple comparison test. The normal distribution of data was confirmed in  
148 all groups using D'Agostino and Pearson omnibus normality test. Pain scores for the  
149 baseline (HS) and co-infusion (HS and NS) conditions are presented as mean  $\pm$   
150 standard error of the mean (SEM) for all parts of the study. Statistical analysis was  
151 performed using GraphPad Prism 7.04 software (La Jolla, California, USA).

152

153 **Results**

154 Prior to the induction and following the cessation of HS evoked muscle pain, all  
155 subjects reported NS infusion (50  $\mu$ L/min) to be imperceptible (i.e. VAS=0 with no  
156 associated percept). In contrast, during the infusion of 5% HS into the FCU always  
157 resulted in a diffuse, deep pain in the muscle that extended down the medial aspect  
158 of the forearm and remained stable in the absence of concurrent NS-infusions (see  
159 Figure 1A as example). At all three test locations (adjacent, contralateral and  
160 remote), infusion of NS significantly increased the HS-evoked pain in all trials (T1-3,  
161  $p < 0.05$ , Figure 1B-D left hand panel). The pooled ( $n=3$ ) mean response for all 10  
162 subjects, with respective HS and HS+NS data points linked, are shown in the right  
163 hand panel of Figure 1B-D ( $p < 0.0001$ ). At each test location, pain returned to  
164 baseline (HS) within 1-min of cessation of NS-co-infusion. The stability of Baseline

165 and reproducibility of co-infusion responses were confirmed by individual RM 2-way  
166 ANOVA for each location with individual differences confirmed by Tukey's multiple  
167 comparisons test; (see below)

168

### 169 *Part 1: Interactions in adjacent muscles*

170 In this arm of the study, the infusion of HS into the FCU resulted in an average pain  
171 score of  $4.3 \pm 0.5$  on the VAS ( $n=10$ ). When NS was co-infused into the adjacent ADM  
172 in the presence of this background pain, the overall pain score increased to  $5.0 \pm 0.4$   
173 (Figure 1B). This constitutes an average increase in pain of 17% and when  
174 comparing the baseline and co-infusion pain scores this pain increase is found to be  
175 significant using a RM 2-way ANOVA ( $p < 0.0001$ ,  $F(1,27) = 318.5$ ). Furthermore,  
176 whilst the infusion of NS in the ADM caused this significant increase in overall pain,  
177 this pain increase was localised to the FCU in eight out of ten subjects, with no  
178 discernible percept attributed to the ADM. This indicates that overall muscle pain can  
179 be modulated in a reproducible and stimulus-locked manner by repeated sub-  
180 perceptual stimulation of an adjacent muscle.

181

### 182 *Part 2: Contralateral interactions*

183 The infusion of HS in the FCU ( $n=10$ ) resulted in an average VAS score of  $4.3 \pm 0.1$ .  
184 The co-infusion of NS in the contralateral FCU increased the overall pain score to  
185  $4.8 \pm 0.2$  (Figure 1C). This represents a 12% increase in subject pain scores during  
186 co-infusion, an effect found to be significant ( $p < 0.0001$ ,  $F(1,27) = 156.7$ ). Once  
187 again, despite the infusion of NS into the contralateral limb, an increase in pain was  
188 perceived at the site of HS infusion in the FCU whilst the NS infusion remained



189 imperceptible in nine out of ten subjects. The demonstration that these interactions  
190 are not limited to adjacent regions, but can be elicited across contralateral muscles,  
191 suggests a central underpinning to this phenomenon.

192

### 193 *Part 3: Remote interactions*

194 Within this aspect of the study, subjects reported an average pain level of  $4.0 \pm 0.1$   
195 ( $n=10$ ) to infusion of HS in the FCU. When NS was administered to the contralateral  
196 TA, a pain increase of 15% was reported with the overall pain intensity increasing to  
197  $4.6 \pm 0.1$  (Figure 1D). A comparison of baseline and co-infusion VAS scores revealed  
198 a significant increase ( $p < 0.0001$ ,  $F(1,27) = 97.84$ ). This pain increase was not felt at  
199 the site of NS infusion in the TA, but rather as an increase in pain at the site of HS  
200 infusion in the FCU of the contralateral arm in nine out of ten subjects. The observed  
201 interaction between the site of noxious muscle stimulation and remote innocuous  
202 muscle stimulation alludes to the involvement of a supra-spinal mechanism.

203

204 In Figure 2, triplicate responses for each individual ( $n=10$ ) at all three test sites  
205 ( $n=90$ ), to transient NS infusion during HS infusion (i.e. HS+NS) have been plotted  
206 as a function of the baseline pain evoked by HS alone. When plotted in this manner  
207 all data points fell to the left of the line of equivalence ( $45^\circ$  line) indicating that the NS  
208 infusion evoked a reproducible pain increase across the entirety (VAS 1.4-6.7) of  
209 baseline pain tests, a range that was defined by the FCU-ADM group.

210

211

## 212 **Discussion**

213 The current study has provided evidence that during HS-induced muscle pain in the  
214 arm (FCU), muscular hypersensitivity extends to adjacent muscles (ADM), the  
215 contralateral arm (FCU), and contralateral leg (TA) in a somatotopically unrestricted  
216 manner. This finding not only builds upon the previous observation that an  
217 intramuscular HS infusion can result in allodynia in the overlying and adjacent skin  
218 regions (Nagi & Mahns, 2013; Nagi et al., 2011; Samour et al., 2015) but reinforces  
219 the role of the central nervous system (CNS) in underpinning this phenomenon.

220 The sub-perceptual nature of repeated intermittent infusions (50  $\mu$ L over 1 min)  
221 under control conditions suggests that localised muscle distension need not activate  
222 the nociceptors, and may well activate low-threshold stretch-sensitive receptors  
223 within muscle. In this respect, these weak mechanical stimuli resemble the inability  
224 of weak (micro) intraneural electrical stimulation to produce a discernible pain  
225 sensation at recording sites dominated by muscle spindles (Gandevia, 1985;  
226 Macefield et al., 1990). The conversion of the sub-perceptual NS stimulus to one that  
227 enhances pain, during HS infusion in the FCU muscle, is unlikely to be due to  
228 peripheral sensitization given the anatomical separation (arm vs hand, >15 cm) and  
229 small volume of intermittently infused NS. Likewise, the corresponding pain evoked  
230 from the contralateral arm is more consistent with a central involvement.  
231 Furthermore, the interaction between the FCU and the contralateral TA suggests that  
232 the central involvement likely extends to supra-spinal structures. This broad ranging  
233 interaction appears to be in marked contrast to the somatotopically constrained  
234 interactions observed in the skin; for example, the confinement of secondary  
235 hyperalgesia to the region immediately surrounding intradermal capsaicin injection  
236 (Ali et al., 1996; Magerl et al., 1998; Simone et al., 1989) or the inability of

237 microstimulation of large-diameter mechanoreceptors innervating a skin region  
238 beyond the site of pain hyperalgesia to produce a painful percept (Torebjörk et al.,  
239 1992).

240 The use of sub-perceptual stimuli during muscle pain revealed a profoundly limited  
241 differentiation of pain locognosia, such that >80% of subjects reported that pain  
242 increased at the HS site (FCU) when NS was infused into adjacent (ADM),  
243 contralateral (FCU) and remote (TA) sites. The NS induced pain increase was time-  
244 locked to the transient NS infusion and was referred to the HS site despite the  
245 subject being well aware of needle insertion (prior to test commencement) in the  
246 adjacent, contralateral or remote muscle. Assertions as to the exact location of this  
247 CNS involvement in mediating this diffuse hypersensitivity cannot be resolved by this  
248 study. Nonetheless, the observation of a regionally diffuse pain-hypersensitivity in an  
249 acute pain model demonstrates that the requisite central circuitry may already be  
250 present, and thus an elaborate anatomical reorganisation need not be necessary for  
251 this to occur.

252 The diffuse pain-hypersensitivity observed in the current study is most likely driven  
253 by a transient and reversible episode of central sensitization (Samour et al., 2017) in  
254 response to the HS-induced muscle pain. The HS infusion alone was run for ~10 min  
255 prior to the commencement of NS co-infusion. The nociceptive input during this  
256 period may have allowed for sensitization of the wide-dynamic-range (WDR) neurons  
257 in the dorsal horn (Arendt-Nielsen & Henriksson, 2007; Yunus, 2007) and thus a  
258 state of central sensitization to develop. Intriguingly, recent molecular work in animal  
259 models has shown that peripheral nociceptive signalling can lead to interactions in  
260 pain processing pathways right up to the cortex (Tochiki et al., 2016). Indeed, the  
261 clinical correlates of central sensitization (Ablin et al., 2008; Yunus, 2007) are

262 apparent in a HS infusion model with hyperalgesia and allodynia reported in this and  
263 previous work (Nagi & Mahns, 2013; Nagi et al., 2011; Samour et al., 2015; Samour  
264 et al., 2017).

265 In regards to the experimental model of intramuscular HS infusion itself, this study is  
266 novel in its findings that an acute intramuscular HS infusion can result in adjacent  
267 (ipsilateral), contralateral and remote muscular pain-hypersensitivities to otherwise  
268 imperceptive stimuli. Previous findings have shown that repeated intramuscular HS  
269 injections in the TA results in a pressure-pain hypersensitivity developing across  
270 both the ipsilateral and contralateral TA muscles (Samour et al., 2017). The  
271 convergent evidence suggests the formation of regionally diffuse sensitivities in HS-  
272 induced pain models. It should now be considered that a contralateral or even  
273 remote limb should not be used as a 'control' sample as somatotopically  
274 unrestrained hypersensitivity may have manifested as a result of the painful  
275 intervention (Shaikh et al., 2016), confounding any data obtained. Rather, the  
276 evidence for centralized effects of intramuscular HS necessitates the need for control  
277 data collection prior to any HS administration, and warrants investigation in other  
278 commonly used pain models.

279 The demonstration of certain clinical correlates of chronic pain conditions in the HS-  
280 infusion model, such as widespread muscular pain hypersensitivity and cutaneous  
281 allodynia which is often reported in fibromyalgia (Berglund et al., 2002; Bradley,  
282 2009; Clauw, 2009; Gracely et al., 2003), may provide an experimental model for  
283 these conditions with the distinct advantage of being transient in nature with full  
284 return to normalcy upon cessation of infusion.

285

286 **Conclusions**

287 Overall, it is evident from the data that the infusion of HS into a muscle results in a  
288 centralized hypersensitivity which evokes an exacerbation of HS-induced pain from  
289 sub-perceptual stimulation of adjacent and remote muscles in a somatotopically  
290 unconstrained manner. Further study of the mechanisms behind the diffuse  
291 hypersensitivity seen in the HS infusion model may advance our understanding of  
292 the conditions characterised by chronic musculoskeletal pain including fibromyalgia.

293

294 **Acknowledgments**

295 The authors would like to acknowledge the work of Sophia Mavromihalis in the  
296 collection of pilot data for this project.

297

298 **Author contributions**

299 The original study was conceived by S. S. Nagi and D. A. Mahns. J. S. Dunn and S.  
300 S. Nagi carried out all experiments. All authors contributed to the design of the study  
301 and discussed the results before the first drafting of the manuscript by J. S. Dunn. D.  
302 A. Mahns and S. S. Nagi contributed to subsequent revisions. All authors read and  
303 approved the final manuscript prior to submission.

304

305 **References**

306 Ablin, J., Neumann, L., & Buskila, D. (2008). Pathogenesis of fibromyalgia - A  
307 review. *Joint Bone Spine*, 75, 273-279.

- 308 Ali, Z., Meyer, R. A., & Campbell, J. N. (1996). Secondary hyperalgesia to  
309 mechanical but not heat stimuli following a capsaicin injection in hairy skin.  
310 *Pain*, 68, 401-411.
- 311 Arendt-Nielsen, L., & Henriksson, K. G. (2007). Pathophysiological mechanisms in  
312 chronic musculoskeletal pain (fibromyalgia): the role of central and peripheral  
313 sensitization and pain disinhibition. *Best Pract Res Clin Rheumatol.*, 21(3),  
314 465-480.
- 315 Basbaum, A. I., Bautista, D. M., Scherrer, G., & Julius, D. (2009). Cellular and  
316 molecular mechanisms of pain. *Cell*, 139, 267-289.
- 317 Berglund, B., Harju, E., Kosek, E., & Lindblom, U. (2002). Quantitative and  
318 qualitative perceptual analysis of cold dysesthesia and hyperalgesia in  
319 fibromyalgia. *Pain*, 96, 177-187.
- 320 Bradley, L. A. (2009). Pathophysiology of Fibromyalgia. *Am. J. Med*, 122, S22-S30.
- 321 Brown, A. G. (1982). The dorsal horn of the spinal cord. *Q. J. Exp. Physiol.*, 67, 193-  
322 212.
- 323 Case, L. K., Čeko, M., Gracely, J. L., Richards, E. A., Olausson, H., & Bushnell, M.  
324 C. (2016). Touch perception altered by chronic pain and by opioid blockade.  
325 *eNeuro*, 10(3). Retrieved from  
326 <http://www.eneuro.org/content/eneuro/3/1/ENEURO.0138-15.2016.full.pdf>  
327 doi:10.1523/ENEURO.0138-15.2016
- 328 Clauw, D. J. (2009). Fibromyalgia: An overview. *Am. J. Med*, 122, S3-S13.
- 329 Clauw, D. J. (2014). Fibromyalgia - A clinical review. *JAMA*, 311(15), 1547-1555.
- 330 Doth, A. H., Hansson, P. T., Jensen, M. P., & Taylor, R. S. (2010). The burden of  
331 neuropathic pain: a systematic review and meta-analysis of health utilities.  
332 *Pain*, 149(2), 338-344. doi:10.1016/j.pain.2010.02.034
- 333 Gandevia, S. C. (1985). Illusory movements produced by electrical stimulation of  
334 low-threshold muscle afferents from the hand. *Brain*, 108 ( Pt 4), 965-981.
- 335 Gracely, R. H., Grant, M. A. B., & Giesecke, T. (2003). Evoked pain measures in  
336 fibromyalgia. *Best Pract Res Clin Rheumatol.*, 17(4), 593-609.
- 337 Graven-Nielsen, T. (2006). Fundamentals of muscle pain, referred pain, and deep  
338 tissue hyperalgesia. *Scand J Rheumatol Suppl*, 35(122), 1-43.
- 339 Graven-Nielsen, T., Arendt-Nielsen, L., Svensson, P., & Jensen, T. S. (1997a).  
340 Experimental muscle pain: A quantitative study of local and referred pain in

- 341 humans following injection of hypertonic saline. *J Musculoskelet Pain*, 5(1),  
342 49-69.
- 343 Graven-Nielsen, T., Arendt-Nielsen, L., Svensson, P., & Jensen, T. S. (1997b).  
344 Quantification of local and referred muscle pain in humans after sequential  
345 i.m. injections of hypertonic saline. *Pain*, 69(1-2), 111-117.
- 346 Kellgren, J. H. (1938). Observations on referred pain arising from muscle. *Clin Sci*, 3,  
347 175-190.
- 348 Koroschetz, J., Rehm, S. E., Gockel, U., Brosz, M., Freynhagen, R., Tölle, T. R., &  
349 Baron, R. (2011). Fibromyalgia and neuropathic pain - differences and  
350 similarities. A comparison of 3057 patients with diabetic painful neuropathy  
351 and fibromyalgia. *BMC Neurol*, 11(1), 55.
- 352 Macefield, G., Gandevia, S. C., & Burke, D. (1990). Perceptual responses to  
353 microstimulation of single afferents innervating joints, muscles and skin of the  
354 human hand. *J. Physiol.*, 429(1), 113-129.
- 355 Magerl, W., Wilk, S. H., & Treede, R. D. (1998). Secondary hyperalgesia and  
356 perceptual wind-up following intradermal injection of capsaicin in humans.  
357 *Pain*, 74, 257-268.
- 358 Nagi, S. S., Dunn, J. S., Birznieks, I., Vickery, R. M., & Mahns, D. A. (2015). The  
359 effects of preferential A- and C-fibre blocks and T-type calcium channel  
360 antagonist on detection of low-force monofilaments in healthy human  
361 participants. *BMC Neuroscience*, 16(1), 1-10. doi:10.1186/s12868-015-0190-2
- 362 Nagi, S. S., & Mahns, D. A. (2013). Mechanical allodynia in human glabrous skin  
363 mediated by low-threshold cutaneous mechanoreceptors with unmyelinated  
364 fibres. *Exp Brain Res*, 231, 139-151.
- 365 Nagi, S. S., Rubin, T. K., Chelvanayagam, D. K., Macefield, V. G., & Mahns, D. A.  
366 (2011). Allodynia mediated by C-tactile afferents in human hairy skin. *J.*  
367 *Physiol.*, 589, 4065-4075.
- 368 Price, D., Long, S., & Huitt, C. (1992). Sensory testing of pathophysiological  
369 mechanisms of pain in patients with reflex sympathetic dystrophy. *Pain*, 49,  
370 163-173.
- 371 Purves, D., Augustine, G. J., Fitzpatrick, D., Katz, L. C., LaMantia, A., McNamara, J.  
372 O., & Williams, S. M. (2001). The Major Afferent Pathway for  
373 Mechanosensory Information: The Dorsal Column-Medial Lemniscus System.  
374 In *Neuroscience* (2 ed.). Sunderland: Sinauer Associates.

- 375 Rubin, T. K., Henderson, L. A., & Macefield, V. G. (2010). Changes in the  
376 spatiotemporal expression of local and referred pain following repeated  
377 intramuscular injections of hypertonic saline: a longitudinal study. *J Pain*,  
378 *11*(8), 737-745.
- 379 Samour, M. S., Nagi, S. S., & Mahns, D. A. (2015). Cav3.2-expressing low-threshold  
380 C fibres in human hairy skin contribute to cold allodynia - a non-TRPV1 and  
381 non-TRPM8-dependent phenomenon. *Pain, in press*.
- 382 Samour, M. S., Nagi, S. S., Shortland, P. J., & Mahns, D. A. (2017). Minocycline  
383 prevents muscular pain hypersensitivity and cutaneous allodynia produced by  
384 repeated intramuscular injections of hypertonic saline in healthy human  
385 participants. *J Pain*, *18*(8), 994-1005.
- 386 Seal, R. P., Wang, X., Guan, Y., Raja, S. N., Woodbury, J., Basbaum, A. I., &  
387 Edwards, R. H. (2009). Injury-induced mechanical hypersensitivity requires C-  
388 low threshold mechanoreceptors. *Nature*, *462*, 651-655.
- 389 Shaikh, S., Shortland, P., Lauto, A., Barton, M., Morley, J. W., & Mahns, D. A.  
390 (2016). Sensory perturbations using suture and sutureless repair of  
391 transected median nerve in rats. *Somatosens Mot Res*, *33*(1), 20-28.  
392 doi:10.3109/08990220.2016.1142438
- 393 Simone, D. A., Baumann, T. K., & LaMotte, R. H. (1989). Dose-dependent pain and  
394 mechanical hyperalgesia in humans after intradermal injection of capsaicin.  
395 *Pain*, *38*, 99-107.
- 396 Steinbrocker, O., Isenberg, S. A., Silver, M., Neustadt, D., Kuhn, P., & Schittone, M.  
397 (1953). Observations on pain produced by injection of hypertonic saline into  
398 muscles and other supportive tissues. *J Clin Invest.*, *32*(10), 1045-1051.
- 399 Tochiki, K. K., Maiarú, M., Norris, C., Hunt, S. P., & Géranton, S. M. (2016). The  
400 mitogen and stress-activated protein kinase 1 regulates the rapid epigenetic  
401 tagging of dorsal horn neurons and nocifensive behaviour. *Pain*, *157*, 2594-  
402 2604.
- 403 Torebjörk, H. E., Lundberg, L. E. R., & LaMotte, C. (1992). Central changes in  
404 processing of mechanoreceptive input in capsaicin-induced secondary  
405 hyperalgesia in humans. *J. Physiol.*, *448*, 765-780.
- 406 van Leeuwen, M. T., Blyth, F. M., March, L. M., Nicholas, M. K., & Cousins, M. J.  
407 (2012). Chronic pain and reduced work effectiveness: The hidden cost to  
408 Australian employers. *Eur. J. Pain*, *10*(2), 161-166.



409 Weerakkody, N. S., Percival, P., Hickey, M. W., Morgan, D. L., Gregory, J. E.,  
410 Canny, B. J., & Proske, U. (2003). Effects of local pressure and vibration on  
411 muscle pain from eccentric exercise and hypertonic saline. *Pain*, *105*, 425-  
412 435.

413 Weerakkody, N. S., Whitehead, N. P., Canny, B. J., Gregory, J. E., & Proske, U.  
414 (2001). Large-fiber mechanoreceptors contribute to muscle soreness after  
415 eccentric exercise. *J Pain*, *2*(4), 209-219.

416 Wolfe, F., Ross, K., Anderson, J. M., Russell, I. J., & Hebert, L. (1995). The  
417 prevalence and characteristics of fibromyalgia in the general population.  
418 *Arthritis Rheum*, *38*(1), 19-28.

419 Yunus, M. B. (2007). Role of central sensitization in symptoms beyond muscle pain,  
420 and the evaluation of a patient with widespread pain. *Best Pract Res Clin*  
421 *Rheumatol.*, *21*(3), 481-497.

422

423

424 **Figure legend**

425 **Figure 1.** *Pain intensities as reported on VAS in response to HS infusion and*  
426 *subsequent to transient NS co-infusion trials at various sites across the body. A.* A  
427 raw trace of a subject's VAS ratings throughout an experimental sitting is shown. In  
428 the absence of background pain infusions of NS for 1 min (T1, T2, T3) were  
429 imperceptible. During baseline HS induced muscle pain in the FCU, co-infusion of  
430 NS (triplicate, left panel B-D) produced a reproducible increase in muscle pain.  
431 Following cessation of HS infusion and the associated background pain (VAS=0) NS  
432 trials were once again imperceptible. In all three sessions HS pain was generated in  
433 the FCU, the test location for NS infusion were the *adjacent* ADM muscle (**B**) and the  
434 *contralateral* FCU (**C**) and TA muscles (**D, remote**). At each test location, co-infusion  
435 with the previously imperceptible NS during HS background pain resulted in a  
436 reproducible (n=3) and significant increase in muscle pain ( $p<0.0001$ , right panel B-  
437 D). The transient pain increase was reproducible across trials at all sites. Significant  
438 changes ( $p<0.0001$ , #) were confirmed between baseline (HS) and co-infusion  
439 (HS+NS) using RM 2-way ANOVA.

440 **Figure 2.** *Triplicate data points for each subject during HS-NS co-infusion plotted as*  
441 *a function of baseline pain.* When triplicate responses from each individual (n=10) at  
442 each location (n=90) to NS infusion during HS infusion (HS+NS) are plotted as a  
443 function of baseline pain (i.e. HS alone) all data points fall to the right of the line of  
444 equivalence. This indicates that the NS infusion evoked a reproducible effect  
445 between trials and across all test sites.

# A. INDIVIDUAL TRACE

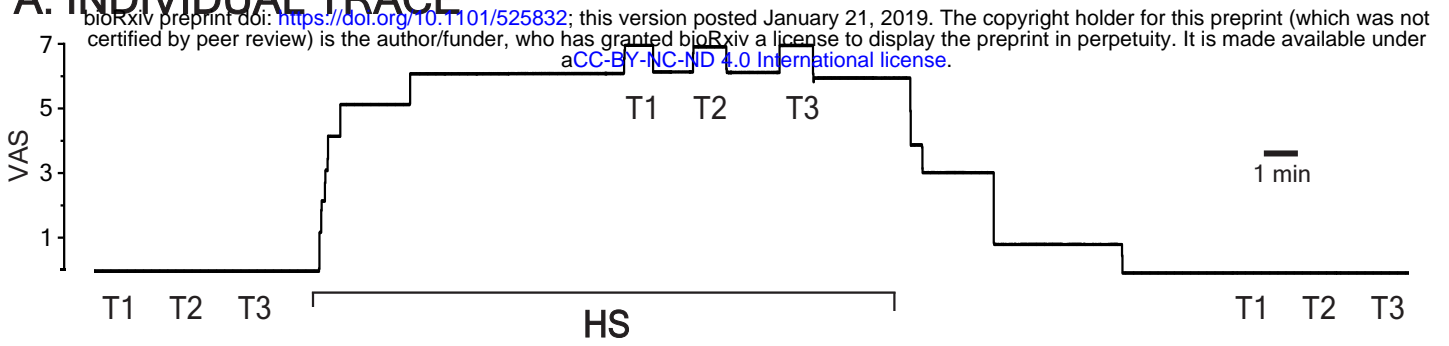

# B. ADJACENT MUSCLE (ADM)

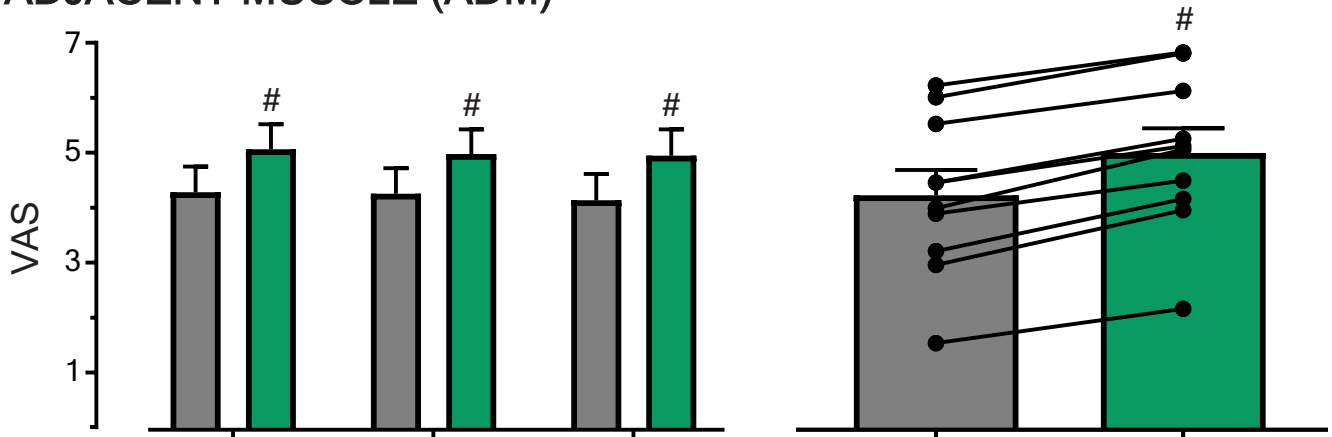

# C. CONTRALATERAL ARM (FCU)

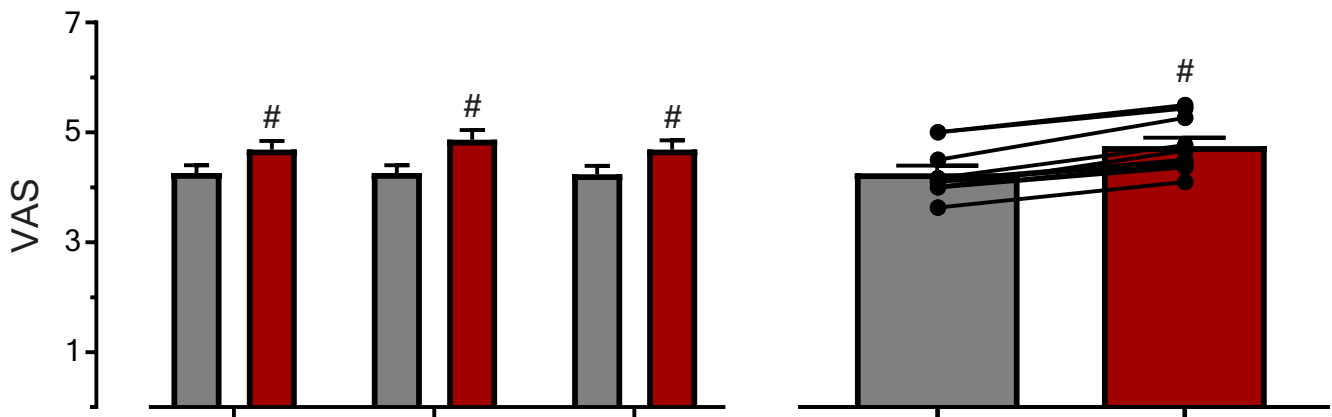

# D. CONTRALATERAL LEG (TA)

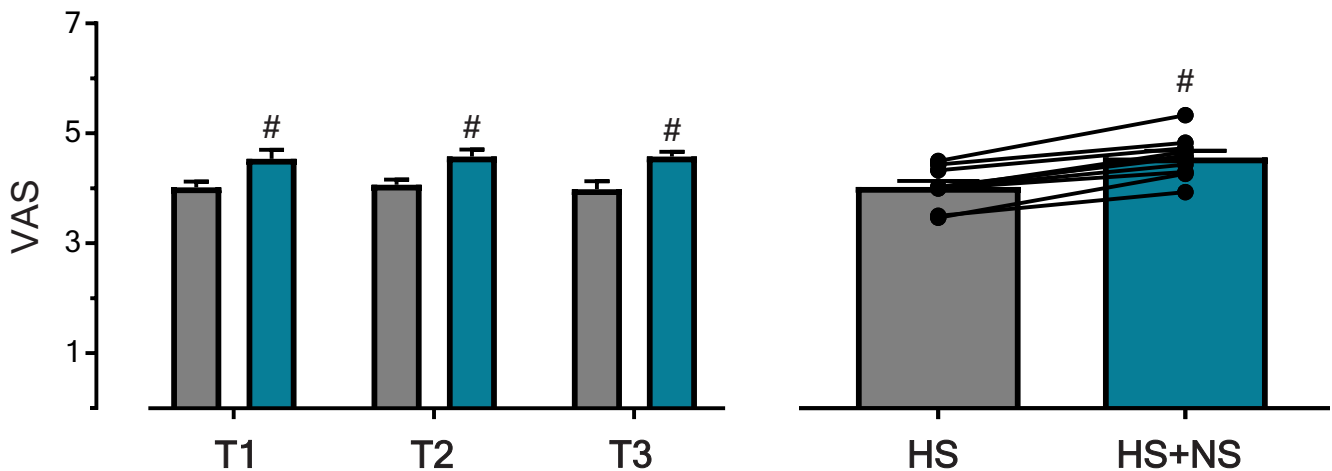

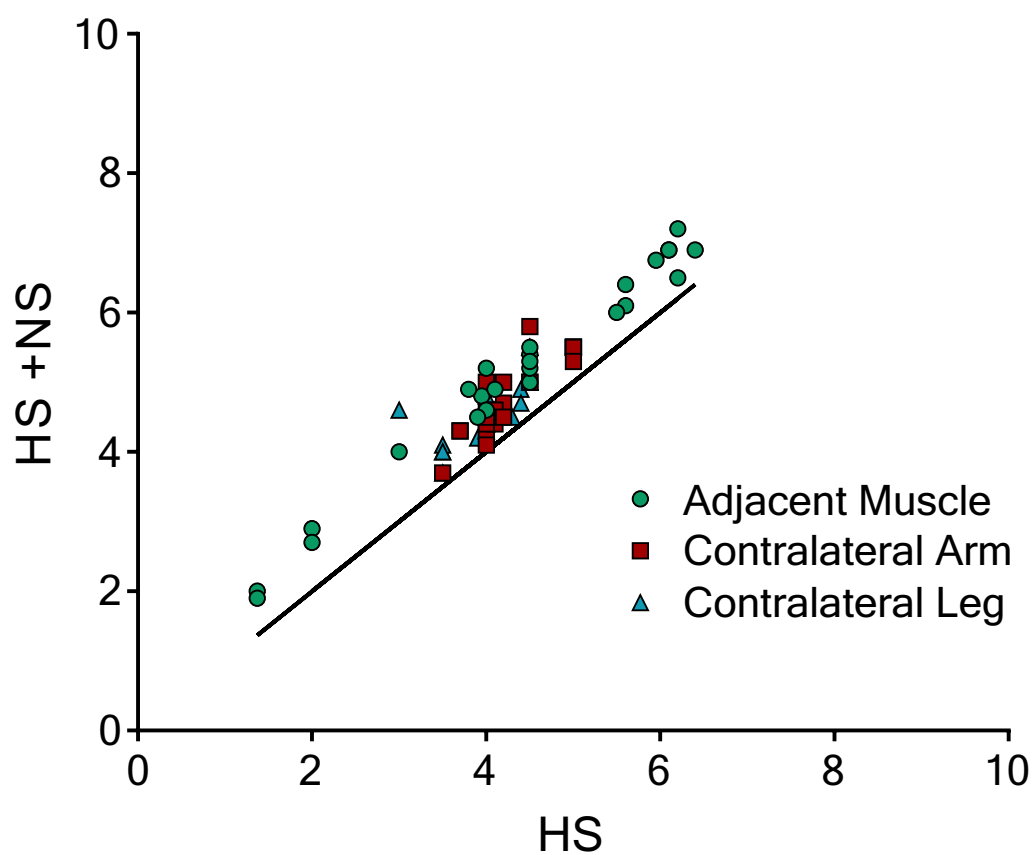

Source: http://biorxiv.org/content/10.1101/525832v1.full.pdf
